# Supplementary material for: Injecting domain knowledge into graph neural networks for protein-protein interactions
Source: Research Square preprint supplement (doi:10.21203/rs.3.rs-4228413/v1), 2024-04-12
Supplement: Supplementary file 1 [file 07848425e7add78face087cf.xlsx]

## Sheet: Sheet 1
ogbn-proteins	https://ogb.stanford.edu/docs/nodeprop/#ogbn-proteins
ogbl-ppa	https://ogb.stanford.edu/docs/linkprop/#ogbl-ppa
HuRI	http://www.interactome-atlas.org/data/HuRI.tsv
STRING annotations	https://stringdb-static.org/download/protein.enrichment.terms.v11.5.txt.gz
GOA annotations	http://release.geneontology.org/2020-06-01/annotations/goa_human.gaf.gz
GO	http://release.geneontology.org/2020-06-01/ontology/index.html
