# Supplementary material for: Injecting domain knowledge into graph neural networks for protein-protein interactions
Source: Research Square preprint supplement (doi:10.21203/rs.3.rs-4228413/v1), 2024-04-12
Supplement: Supplementary file 2 [file 919420c112234b229e55398e.xlsx]

## Sheet: Sheet 1
Parameter	TransE	distMult	ComplEx
Train times	500	500	1000
Number batches	100	100	100
Learning rate	0.001	0.5	0.5
Optimization method	SGD	Adagrad	Adagrad
Embedding size	50	50	50
Entity neg rate	1	1	1
Relation neg rate	0	0	0
Bern	1	0	1
Lambda	0.05	-	0.05
Margin	-	1	-
