# Supplementary material for: Injecting domain knowledge into graph neural networks for protein-protein interactions
Source: Research Square preprint supplement (doi:10.21203/rs.3.rs-4228413/v1), 2024-04-12
Supplement: Supplementary file 3 [file ab9771287bd3bf8481cb4ed4.xlsx]

## Sheet: Sheet 1
GCN, GraphSAGE	https://github.com/snap-stanford/ogb/tree/master/examples/nodeproppred/proteins
NGNN-GCN/GraphSAGE	https://github.com/dmlc/dgl/tree/master/examples/pytorch/ogb/ngnn
DeeperGCN	https://github.com/lightaime/deep_gcns_torch/tree/master/examples/ogb
DeeperGCN- FLAG	https://github.com/devnkong/FLAG
MWE-DGCN	https://github.com/dmlc/dgl/tree/master/examples/pytorch/ogb/ogbn-proteins
GAT	https://github.com/Espylapiza/dgl/tree/master/examples/pytorch/ogb/ogbn-proteins
AGDN	https://github.com/skepsun/Adaptive-Graph-Diffusion-Networks
GCN+SEAL	https://github.com/facebookresearch/SEAL_OGB
NGNN+SEAL	https://github.com/dmlc/dgl/tree/master/examples/pytorch/ogb/ngnn_seal
