# Supplementary material for: Injecting domain knowledge into graph neural networks for protein-protein interactions
Source: Research Square preprint supplement (doi:10.21203/rs.3.rs-4228413/v1), 2024-04-12
Supplement: Supplementary file 4 [file b2ab3be2a28394f7c93a49f5.xlsx]

## Sheet: Sheet 1
Parameter	Value
Embedding size	50
Maximum # of walks per entity	100
Maximum walk depth	4
Word2vec model	skip-gram
Epochs for Word2vec	5
Window for Word2vec	5
Minimum count for Word2vec	1
Optimization for softmax	negative sampling
# of noise words drawn in neg. sampling	5
Learning rate	0.025
