# Supplementary material for: Injecting domain knowledge into graph neural networks for protein-protein interactions
Source: Research Square preprint supplement (doi:10.21203/rs.3.rs-4228413/v1), 2024-04-12
Supplement: Supplementary file 5 [file ce55f62abbb25a2e7e1288dd.xlsx]

## Sheet: Sheet 1
	Batch size	Learning Rate	Hidden Channels	Epochs	Dropout
GCN	-	0.01	256	1000	0.0
GraphSAGE	-	0.01	256	1000	0.0
NGNN-GCN	-	0.001	256	1000	0.0
NGNN-GS	-	0.001	256	1000	0.0
DeeperGCN	10*	0.001	64	1000	0.0
DeeperGCN-FLAG	10*	0.01	64	1000	0.1
MWE-DGCN	10*	0.01	10	2000	0.5
GAT	10*	0.01	80	1200	0.25
AGDN	-	0.01	150	2000	0.4
