# Supplementary material for: Injecting domain knowledge into graph neural networks for protein-protein interactions
Source: Research Square preprint supplement (doi:10.21203/rs.3.rs-4228413/v1), 2024-04-12
Supplement: Supplementary file 6 [file da96a457d8108b69e2591dee.xlsx]

## Sheet: Sheet 1
	Batch size	Learning Rate	Hidden Channels	Epochs	Dropout
GCN	65,536	0.01	256	20	0.0
GraphSAGE	65,536	0.01	256	20	0.0
NGNN-GCN	49,152	0.001	256	80	0.0
NGNN-GS	49,152	0.001	256	80	0.0
GCN+SEAL	32	0.0001	32	20	0.5
NGNN+SEAL	128	0.00015	48	50	0.0
